# Supplementary material for: Recurrent Superenhancer of the Oncogene POU5F1B in Colorectal Cancers
Source: Hindawi journal article supplement (doi:10.1155/2021/5405060), 2021-01-01
Supplement: f1 [file 5405060.f1.pdf]

| Supplementary Table 1. Super-enhancers of HCT116 and sigmoid colon tissue |           |           |                     |             |
|---------------------------------------------------------------------------|-----------|-----------|---------------------|-------------|
| CHROM                                                                     | START     | STOP      | OVERLAP_GENES       | sample      |
| chr4                                                                      | 30715635  | 30985709  | PCDH7               | HCT116      |
| chr12                                                                     | 76012567  | 76308058  |                     | HCT116      |
| chr8                                                                      | 94806886  | 94974157  | PDP1,TMEM67         | HCT116      |
| chr1                                                                      | 8062403   | 8276419   | ERRFI1              | HCT116      |
| chr17                                                                     | 57819217  | 57948130  | TUBD1,MIR21,TMEM49  | HCT116      |
| chr8                                                                      | 128213237 | 128320517 |                     | HCT116      |
| chr18                                                                     | 3583398   | 3671591   | FLJ35776,DLGAP1     | HCT116      |
| chrX                                                                      | 45556718  | 45712940  | MIR221,MIR222       | HCT116      |
| chr9                                                                      | 21504387  | 21620428  | MIR31,LOC554202     | HCT116      |
| chr8                                                                      | 126648569 | 126715409 |                     | HCT116      |
| chr7                                                                      | 130577088 | 130613286 | LOC646329           | HCT116      |
| chr2                                                                      | 226962857 | 227081710 |                     | HCT116      |
| chr10                                                                     | 95066150  | 95240291  | MYOF                | HCT116      |
| chr4                                                                      | 169396470 | 169587808 | PALLD,DDX60L        | HCT116      |
| chr2                                                                      | 227474323 | 227667763 | IRS1                | HCT116      |
| chr12                                                                     | 66211168  | 66360711  | HMGA2,RPSAP52       | HCT116      |
| chr4                                                                      | 75533644  | 75609159  |                     | HCT116      |
| chr1                                                                      | 66720417  | 66842146  | PDE4B               | HCT116      |
| chr12                                                                     | 65815524  | 65960302  | MSRB3               | HCT116      |
| chr3                                                                      | 98230313  | 98310800  | CPOX,CLDND1,GPR15   | HCT116      |
| chr1                                                                      | 94626600  | 94801626  | ARHGAP29            | HCT116      |
| chr10                                                                     | 114273809 | 114301008 | VTI1A               | HCT116      |
| chr12                                                                     | 89311073  | 89367919  |                     | HCT116      |
| chr8                                                                      | 126120895 | 126252220 | NSMCE2              | HCT116      |
| chr6                                                                      | 151325928 | 151463163 | MTHFD1L             | HCT116      |
| chr15                                                                     | 67313619  | 67489329  | SMAD3               | HCT116      |
| chr20                                                                     | 52719281  | 52796961  | CYP24A1             | HCT116      |
| chr4                                                                      | 11586609  | 11655306  |                     | HCT116      |
| chr8                                                                      | 144978519 | 145051891 | PLEC,PARP10,MIR661  | HCT116      |
| chr12                                                                     | 65994430  | 66093741  |                     | HCT116      |
| chr11                                                                     | 118758450 | 118819179 | CXCR5,BCL9L         | HCT116      |
| chr9                                                                      | 21666769  | 21713247  |                     | HCT116      |
| chr10                                                                     | 97067908  | 97329002  | SORBS1              | sigmoid col |
| chr8                                                                      | 30239370  | 30463132  | GTF2E2,RBPMS        | sigmoid col |
| chr2                                                                      | 218593831 | 218869769 | TNS1,DIRC3          | sigmoid col |
| chr10                                                                     | 80819113  | 81097206  | ZMIZ1,LOC283050     | sigmoid col |
| chr7                                                                      | 134361432 | 134652706 | BPGM,CALD1          | sigmoid col |
| chr2                                                                      | 240119391 | 240322816 | HDAC4,MIR4269       | sigmoid col |
| chr14                                                                     | 69307184  | 69453786  | ACTN1               | sigmoid col |
| chr2                                                                      | 238026837 | 238331022 | COL6A3              | sigmoid col |
| chr22                                                                     | 36673350  | 36786955  | MYH9                | sigmoid col |
| chr1                                                                      | 39541741  | 39902274  | KIAA0754,MACF1      | sigmoid col |
| chr12                                                                     | 124836892 | 125054594 | NCOR2               | sigmoid col |
| chr17                                                                     | 75345538  | 75491773  | SEPT9,MIR4316       | sigmoid col |
| chr2                                                                      | 206544923 | 206676527 | NRP2                | sigmoid col |
| chr4                                                                      | 119808810 | 119968619 | SYNPO2              | sigmoid col |
| chr9                                                                      | 124022694 | 124138630 | STOM,GSN            | sigmoid col |
| chr16                                                                     | 15790669  | 15974706  | NDE1,MYH11,C16orf63 | sigmoid col |
| chr19                                                                     | 3332873   | 3470677   | NFIC                | sigmoid col |

|       |           |           |                            |             |
|-------|-----------|-----------|----------------------------|-------------|
| chr8  | 38584294  | 38824118  | TACC1,PLEKHA2              | sigmoid col |
| chr11 | 12381536  | 12579807  | PARVA                      | sigmoid col |
| chr12 | 11800965  | 12039289  | ETV6                       | sigmoid col |
| chr14 | 68541323  | 68777621  | RAD51L1                    | sigmoid col |
| chr1  | 10688467  | 10857232  | CASZ1,PEX14                | sigmoid col |
| chr21 | 47370259  | 47563978  | FTCD,COL6A1,COL6A2         | sigmoid col |
| chr2  | 66651643  | 66814445  | MEIS1                      | sigmoid col |
| chr2  | 220267587 | 220352786 | DES,SPEG                   | sigmoid col |
| chr1  | 226814470 | 226929055 | ITPKB                      | sigmoid col |
| chr3  | 66391598  | 66558774  | LRIG1,SLC25A26             | sigmoid col |
| chr19 | 13106553  | 13216371  | TRMT1,NFIX,LYL1            | sigmoid col |
| chr17 | 46616216  | 46679458  | HOXB4,HOXB6,LOC404266,HOXB | sigmoid col |
| chr4  | 7744682   | 7981377   | ABLIM2,AFAP1,AFAP1-AS1     | sigmoid col |
| chr1  | 22179166  | 22288972  | HSPG2                      | sigmoid col |
| chr10 | 88420951  | 88609766  | LDB3,OPN4,BMPRI1A          | sigmoid col |
| chr1  | 19667678  | 19861084  | CAPZB                      | sigmoid col |
| chr17 | 735217    | 884454    | NXN                        | sigmoid col |
| chr9  | 94527617  | 94717610  | ROR2                       | sigmoid col |
| chr11 | 19617115  | 19869182  | NAV2,LOC100126784          | sigmoid col |
| chr3  | 57984099  | 58163937  | FLNB                       | sigmoid col |
| chr16 | 16039874  | 16254980  | ABCC1,ABCC6                | sigmoid col |
| chr3  | 123324340 | 123443391 | MYLK                       | sigmoid col |
| chr9  | 117777933 | 117931898 | TNC,DEC1                   | sigmoid col |
| chr3  | 73520110  | 73683862  | PDZRN3                     | sigmoid col |
| chr3  | 71005546  | 71194823  | FOXP1                      | sigmoid col |
| chr17 | 55962597  | 56034365  | CUEDC1                     | sigmoid col |
| chr1  | 203592431 | 203696209 | ATP2B4                     | sigmoid col |
| chr14 | 74177567  | 74265026  | C14orf43,PNMA1             | sigmoid col |
| chr1  | 27800771  | 27931312  | WASF2,AHDC1                | sigmoid col |
| chr14 | 92977376  | 93161366  | RIN3                       | sigmoid col |
| chr5  | 58364186  | 58625634  | PDE4D                      | sigmoid col |
| chr20 | 42726202  | 42841796  | JPH2,C20orf111             | sigmoid col |
| chr10 | 71151703  | 71268339  | HK1,TSPAN15,TACR2          | sigmoid col |
| chr1  | 8401601   | 8538907   | SLC45A1,RERE               | sigmoid col |
| chr16 | 70672684  | 70794789  | LOC100130894,VAC14,MTSS1   | sigmoid col |
| chr10 | 81134663  | 81214794  | ZCCHC24                    | sigmoid col |
| chr18 | 42258308  | 42440606  | SETBP1                     | sigmoid col |
| chr5  | 156874035 | 157004958 | NIPAL4,ADAM19              | sigmoid col |
| chr14 | 55030911  | 55217183  | SAMD4A                     | sigmoid col |
| chr10 | 78923221  | 79081767  | KCNMA1                     | sigmoid col |
| chr13 | 97862914  | 98022524  | MBNL2                      | sigmoid col |
| chr11 | 12131474  | 12271572  | MICAL2                     | sigmoid col |
| chr10 | 63656893  | 63857367  | ARID5B                     | sigmoid col |
| chr4  | 169717184 | 169852624 | PALLD                      | sigmoid col |
| chr3  | 159477796 | 159629267 | IQCJ-SCHIP1,SCHIP1         | sigmoid col |
| chr10 | 125502169 | 125673984 | CPXM2                      | sigmoid col |
| chr9  | 124318012 | 124544007 | DAB2IP                     | sigmoid col |
| chr9  | 132642101 | 132808219 | USP20,FNBP1                | sigmoid col |
| chr2  | 47181687  | 47336185  | TTC7A,C2orf61              | sigmoid col |
| chr20 | 45924428  | 46014038  | ZMYND8,LOC100131496        | sigmoid col |
| chr14 | 59646281  | 59846774  | DAAM1                      | sigmoid col |
| chr3  | 64090594  | 64282175  | PRICKLE2                   | sigmoid col |

|       |           |           |                             |             |
|-------|-----------|-----------|-----------------------------|-------------|
| chr11 | 65237402  | 65278433  | MALAT1                      | sigmoid col |
| chr12 | 109023871 | 109129285 | SELPLG,CORO1C               | sigmoid col |
| chr9  | 79412710  | 79522712  | PRUNE2                      | sigmoid col |
| chr13 | 110966059 | 111037875 | COL4A2                      | sigmoid col |
| chr1  | 92175417  | 92357108  | TGFB3                       | sigmoid col |
| chr3  | 123030630 | 123169932 | ADCY5                       | sigmoid col |
| chr4  | 87919942  | 88045937  | AFF1                        | sigmoid col |
| chr19 | 39125214  | 39227056  | ACTN4,CAPN12,EIF3K          | sigmoid col |
| chr4  | 37953028  | 38136565  | TBC1D1,PTTG2                | sigmoid col |
| chr9  | 133639529 | 133763516 | ABL1                        | sigmoid col |
| chr1  | 201847186 | 201919717 | SHISA4,LMOD1,IPO9           | sigmoid col |
| chr11 | 113979520 | 114074224 | ZBTB16                      | sigmoid col |
| chr14 | 99976953  | 100072481 | CCDC85C,CCNK                | sigmoid col |
| chr7  | 27199991  | 27240800  | HOXA10,HOXA9,MIR196B,HO     | sigmoid col |
| chr1  | 203408496 | 203530711 | PRELP,OPTC                  | sigmoid col |
| chr1  | 201416945 | 201483187 | PHLDA3,CSRP1                | sigmoid col |
| chr5  | 131712779 | 131842675 | SLC22A5,C5orf56,IRF1        | sigmoid col |
| chr5  | 172259497 | 172359615 | ERGIC1                      | sigmoid col |
| chr19 | 11236442  | 11321307  | KANK2,SPC24,LDLR,DOCK6      | sigmoid col |
| chr4  | 174387053 | 174497382 | NBLA00301,HAND2             | sigmoid col |
| chr7  | 4670899   | 4817053   | FOXX1,KIAA0415              | sigmoid col |
| chr2  | 43519439  | 43714382  | THADA                       | sigmoid col |
| chr10 | 592954    | 735712    | DIP2C,C10orf108             | sigmoid col |
| chr9  | 71030993  | 71176468  | C9orf71,PGM5                | sigmoid col |
| chr10 | 95135439  | 95243763  | MYOF                        | sigmoid col |
| chr17 | 38588850  | 38716694  | IGFBP4,TNS4,CCR7            | sigmoid col |
| chr2  | 128386624 | 128435773 | MYO7B,LIMS2,GPR17           | sigmoid col |
| chr16 | 17389505  | 17511947  | XYLT1                       | sigmoid col |
| chr17 | 71273682  | 71366126  | CDC42EP4,SDK2               | sigmoid col |
| chr17 | 17583962  | 17697820  | SMCR5,RAI1                  | sigmoid col |
| chr9  | 72654432  | 72777291  | MAMDC2                      | sigmoid col |
| chr5  | 148782443 | 148819183 | MIR145,MIR143,LOC728264     | sigmoid col |
| chr16 | 85546904  | 85708470  | KIAA0182                    | sigmoid col |
| chr2  | 238766868 | 238841331 | RAMP1                       | sigmoid col |
| chr2  | 238569476 | 238654272 | LRRFIP1                     | sigmoid col |
| chr12 | 125088063 | 125271535 | SCARB1                      | sigmoid col |
| chr7  | 5366560   | 5470660   | TNRC18                      | sigmoid col |
| chr18 | 8701384   | 8861049   | KIAA0802                    | sigmoid col |
| chr1  | 156425635 | 156484058 | MEF2D                       | sigmoid col |
| chr1  | 225597192 | 225677621 | LBR,ENAH                    | sigmoid col |
| chr2  | 36579524  | 36743370  | CRIM1                       | sigmoid col |
| chr6  | 56299611  | 56439244  | DST                         | sigmoid col |
| chr4  | 148652156 | 148788088 | ARHGAP10                    | sigmoid col |
| chr3  | 141079405 | 141171329 | ZBTB38                      | sigmoid col |
| chr9  | 132934813 | 133005625 | NCS1                        | sigmoid col |
| chr20 | 43145668  | 43247483  | PKIG,SERINC3                | sigmoid col |
| chr20 | 60876684  | 60958362  | ADRM1,LAMA5                 | sigmoid col |
| chr5  | 149107516 | 149211907 | PPARGC1B                    | sigmoid col |
| chr9  | 101704282 | 101834447 | COL15A1                     | sigmoid col |
| chr19 | 1238058   | 1276973   | C19orf23,CIRBP,C19orf24,ATF | sigmoid col |
| chr7  | 101498850 | 101606055 | CUX1                        | sigmoid col |
| chr16 | 1199202   | 1254782   | CACNA1H                     | sigmoid col |

|       |           |           |                      |             |
|-------|-----------|-----------|----------------------|-------------|
| chr1  | 2160092   | 2263332   | MORN1,SKI            | sigmoid col |
| chr13 | 33742181  | 33864932  | STARD13              | sigmoid col |
| chr2  | 23724453  | 23846277  | KLHL29               | sigmoid col |
| chr2  | 20765692  | 20852503  | HS1BP3               | sigmoid col |
| chr17 | 43343399  | 43399417  | LOC100133991,MAP3K14 | sigmoid col |
| chr1  | 202466641 | 202569811 | SYT2,PPP1R12B        | sigmoid col |
| chr14 | 93418611  | 93583402  | ITPK1,ITPK1-AS1      | sigmoid col |
| chr19 | 6035243   | 6110632   | RFX2                 | sigmoid col |
| chr2  | 1594542   | 1762048   | PXDN                 | sigmoid col |
| chr11 | 118740190 | 118805385 | CXCR5,BCL9L          | sigmoid col |
| chr11 | 10599218  | 10732178  | LOC100129827,MRVI1   | sigmoid col |
| chr10 | 7575867   | 7713729   | ITIH5                | sigmoid col |
| chr11 | 68764236  | 68857608  | TPCN2,MRGPRF         | sigmoid col |
| chr10 | 79255372  | 79401549  | KCNMA1               | sigmoid col |
| chr9  | 672906    | 759755    | KANK1                | sigmoid col |
| chr16 | 86523531  | 86553845  | LOC400550,FOXF1      | sigmoid col |
| chr1  | 61508425  | 61670191  | NFIA                 | sigmoid col |
| chr9  | 129837952 | 129965851 | RALGPS1,ANGPTL2      | sigmoid col |
| chr1  | 162621556 | 162706941 | DDR2                 | sigmoid col |
| chr14 | 32866796  | 32994109  | AKAP6                | sigmoid col |
| chr6  | 34981284  | 35064986  | ANKS1A               | sigmoid col |
| chr11 | 73017480  | 73098013  | ARHGEF17,RELT        | sigmoid col |
| chr9  | 130253859 | 130348843 | LRSAM1,FAM129B       | sigmoid col |
| chr5  | 146762126 | 146893083 | STK32A,DPYSL3        | sigmoid col |
| chr3  | 194822790 | 194981545 | C3orf21              | sigmoid col |
| chr12 | 6276111   | 6347067   | CD9                  | sigmoid col |
| chr12 | 122833581 | 122922866 | CLIP1                | sigmoid col |
| chr13 | 110905931 | 110965944 | COL4A2,COL4A1        | sigmoid col |
| chr9  | 90112168  | 90236181  | DAPK1                | sigmoid col |
| chr14 | 65077445  | 65231705  | SPTB,PLEKHG3         | sigmoid col |
| chr12 | 109163685 | 109253002 | SSH1                 | sigmoid col |
| chr3  | 11539082  | 11686457  | VGLL4,ATG7           | sigmoid col |
| chr16 | 84851819  | 84987869  | CRISPLD2             | sigmoid col |
| chr9  | 137528580 | 137631128 | COL5A1               | sigmoid col |
| chr8  | 142126398 | 142185325 | DENND3               | sigmoid col |
| chrX  | 135228332 | 135298250 | FHL1,MAP7D3          | sigmoid col |
| chr11 | 12783407  | 12937416  | TEAD1                | sigmoid col |
| chr20 | 47956869  | 48101382  | KCNB1                | sigmoid col |
| chr2  | 161124304 | 161286771 | RBMS1                | sigmoid col |
| chr6  | 151559643 | 151661227 | AKAP12               | sigmoid col |
| chr5  | 14142004  | 14221452  | TRIO                 | sigmoid col |
| chr17 | 79300430  | 79404230  | BAHCC1,TMEM105       | sigmoid col |
| chr15 | 63332306  | 63400991  | TPM1                 | sigmoid col |
| chr22 | 41762080  | 41857565  | TEF,PHF5A,TOB2       | sigmoid col |
| chr22 | 31471398  | 31504800  | SMTN,SELM            | sigmoid col |
| chr14 | 77466311  | 77519802  | C14orf4              | sigmoid col |
| chr2  | 217535404 | 217627949 | IGFBP5               | sigmoid col |
| chr11 | 94464921  | 94580027  | AMOTL1               | sigmoid col |
| chr14 | 100196453 | 100290045 | EML1                 | sigmoid col |
| chr1  | 164528211 | 164644042 | PBX1                 | sigmoid col |
| chr1  | 156066200 | 156114581 | LMNA                 | sigmoid col |
| chr8  | 124498557 | 124560709 | FBXO32               | sigmoid col |

|       |           |           |                           |             |
|-------|-----------|-----------|---------------------------|-------------|
| chr7  | 28037096  | 28181652  | JAZF1                     | sigmoid col |
| chr13 | 99097085  | 99234797  | FARP1,STK24               | sigmoid col |
| chr19 | 47582415  | 47714915  | SAE1,ZC3H4                | sigmoid col |
| chr6  | 112500005 | 112620707 | LAMA4                     | sigmoid col |
| chr7  | 5691818   | 5750139   | RNF216                    | sigmoid col |
| chr6  | 108865426 | 108944881 | FOXO3                     | sigmoid col |
| chr10 | 104503553 | 104579933 | C10orf26                  | sigmoid col |
| chr1  | 54734312  | 54875336  | SSBP3                     | sigmoid col |
| chr12 | 94060538  | 94182137  | CRADD                     | sigmoid col |
| chr14 | 69244470  | 69287563  | C14orf181,ZFP36L1         | sigmoid col |
| chr7  | 115849675 | 115928979 | TES                       | sigmoid col |
| chr1  | 36580070  | 36673586  | MAP7D1,TRAPPC3            | sigmoid col |
| chr12 | 54783803  | 54833637  | ZNF385A,ITGA5             | sigmoid col |
| chr9  | 132213147 | 132264695 |                           | sigmoid col |
| chr15 | 93561282  | 93634675  | CHD2,RGMA                 | sigmoid col |
| chr14 | 68400418  | 68528086  | RAD51L1                   | sigmoid col |
| chr18 | 57290187  | 57372921  | CCBE1                     | sigmoid col |
| chr2  | 40542500  | 40686954  | SLC8A1                    | sigmoid col |
| chr5  | 172158592 | 172234288 | DUSP1                     | sigmoid col |
| chr11 | 117040136 | 117097967 | PCSK7,TAGLN,PAFAH1B2,SIDT | sigmoid col |
| chr11 | 68078439  | 68175071  | LRP5                      | sigmoid col |
| chr15 | 37368349  | 37426866  | MEIS2                     | sigmoid col |
| chr3  | 188225391 | 188452589 | LPP                       | sigmoid col |
| chr3  | 149244524 | 149380951 | WWTR1                     | sigmoid col |
| chr11 | 125876120 | 126012385 | CDON                      | sigmoid col |
| chr15 | 63120449  | 63213883  | TLN2                      | sigmoid col |
| chr3  | 57873230  | 57961360  | SLMAP                     | sigmoid col |
| chr1  | 9349430   | 9475511   | SPSB1                     | sigmoid col |
| chr1  | 21619274  | 21674780  | ECE1                      | sigmoid col |
| chr3  | 187921447 | 187968722 | LPP                       | sigmoid col |
| chr22 | 46436271  | 46467014  | C22orf26,LOC100271722,LOC | sigmoid col |
| chr4  | 141846189 | 141981686 | RNF150                    | sigmoid col |
| chr5  | 123970162 | 124086007 | ZNF608                    | sigmoid col |
| chr12 | 56091853  | 56126818  | BLOC1S1,CD63,RDH5,ITGA7   | sigmoid col |
| chr9  | 35487782  | 35565278  | FAM166B,RUSC2             | sigmoid col |
| chr19 | 48092751  | 48171743  | GLTSCR1                   | sigmoid col |
| chr22 | 43281319  | 43405310  | PACSIN2                   | sigmoid col |
| chr12 | 15268027  | 15380741  | RERG                      | sigmoid col |
| chr1  | 12598650  | 12683379  | DHRS3                     | sigmoid col |
| chr1  | 154377066 | 154419815 | IL6R                      | sigmoid col |
| chr17 | 42852367  | 42922393  | GJC1,ADAM11               | sigmoid col |
| chr7  | 75920137  | 76023434  | HSPB1,YWHAG,SRCRB4D       | sigmoid col |
| chr3  | 42053555  | 42143555  | TRAK1                     | sigmoid col |
| chr14 | 94393756  | 94468144  | C14orf48,FAM181A,ASB2     | sigmoid col |
| chr9  | 130704493 | 130745146 | FAM102A                   | sigmoid col |
| chr10 | 120965252 | 121078864 | GRK5                      | sigmoid col |
| chr16 | 88803495  | 88852485  | FAM38A                    | sigmoid col |
| chr16 | 27323992  | 27386418  | IL4R                      | sigmoid col |
| chr5  | 67509755  | 67587304  | PIK3R1                    | sigmoid col |
| chr7  | 137592839 | 137686997 | CREB3L2                   | sigmoid col |
| chr10 | 126293018 | 126434844 | FAM53B,LHPP               | sigmoid col |
| chr12 | 109535862 | 109624404 | UNG,ACACB                 | sigmoid col |

|       |           |           |                            |             |
|-------|-----------|-----------|----------------------------|-------------|
| chr3  | 124479910 | 124620347 | ITGB5                      | sigmoid col |
| chr12 | 48192005  | 48224322  | HDAC7                      | sigmoid col |
| chr20 | 35903313  | 35995346  | MANBAL, SRC                | sigmoid col |
| chr20 | 35437506  | 35495157  | C20orf117                  | sigmoid col |
| chr6  | 57035092  | 57092216  | BAG2, ZNF451, RAB23        | sigmoid col |
| chr22 | 46467107  | 46491336  | MIR3619, LOC400931         | sigmoid col |
| chr16 | 81634224  | 81765552  | CMIP                       | sigmoid col |
| chr17 | 76849214  | 76933001  | TIMP2                      | sigmoid col |
| chr2  | 67007294  | 67142981  |                            | sigmoid col |
| chr1  | 204367384 | 204483013 | PPP1R15B, PIK3C2B          | sigmoid col |
| chr11 | 44746231  | 44808108  | TSPAN18                    | sigmoid col |
| chr17 | 40497778  | 40589509  | STAT3, PTRF                | sigmoid col |
| chr10 | 123855760 | 123953009 | TACC2                      | sigmoid col |
| chr19 | 16174554  | 16225919  | TPM4, RAB8A                | sigmoid col |
| chr11 | 8719370   | 8758695   | ST5                        | sigmoid col |
| chr6  | 57107542  | 57183112  | PRIM2                      | sigmoid col |
| chr7  | 116129452 | 116203091 | CAV1, CAV2                 | sigmoid col |
| chr1  | 12484439  | 12580357  | VPS13D, SNORA59A           | sigmoid col |
| chr1  | 234717012 | 234755007 | IRF2BP2                    | sigmoid col |
| chr11 | 65183541  | 65216947  | MIR612, NEAT1              | sigmoid col |
| chr11 | 10876226  | 10967707  | LOC729013, ZBED5           | sigmoid col |
| chr15 | 99392269  | 99508396  | IGF1R                      | sigmoid col |
| chr14 | 69051375  | 69157548  | RAD51L1                    | sigmoid col |
| chr10 | 18428205  | 18541375  | CACNB2                     | sigmoid col |
| chr7  | 107557949 | 107657750 | LAMB1, DLD                 | sigmoid col |
| chr13 | 47125988  | 47274875  | LRCH1                      | sigmoid col |
| chr1  | 234622959 | 234702362 |                            | sigmoid col |
| chr15 | 96859951  | 96900823  | NR2F2, MIR1469             | sigmoid col |
| chr9  | 72997531  | 73057546  | KLF9                       | sigmoid col |
| chr6  | 154747818 | 154833872 | CNKS3                      | sigmoid col |
| chr16 | 73053000  | 73117173  | ZFH3                       | sigmoid col |
| chr6  | 35435315  | 35467112  | TULP1, TEAD3, RPL10A       | sigmoid col |
| chr8  | 23149584  | 23230539  | R3HCC1, LOXL2              | sigmoid col |
| chr1  | 203236313 | 203297871 | BTG2, LOC730227            | sigmoid col |
| chr8  | 11652611  | 11756002  | FDFT1, CTSB                | sigmoid col |
| chr16 | 50581639  | 50662105  | NKD1                       | sigmoid col |
| chr2  | 43437386  | 43506425  | THADA, LOC100129726, ZFP36 | sigmoid col |
| chr10 | 47081331  | 47149744  | LOC728643, PPYR1, LOC64365 | sigmoid col |
| chr22 | 36835145  | 36878966  | TXN2                       | sigmoid col |
| chr6  | 56502175  | 56642381  | DST                        | sigmoid col |
| chr17 | 38239383  | 38271613  | NR1D1, THRA                | sigmoid col |
| chr22 | 36223683  | 36327645  | RBFOX2                     | sigmoid col |
| chr1  | 236134203 | 236232684 | NID1                       | sigmoid col |
| chr12 | 122488077 | 122530621 | BCL7A, MLXIP               | sigmoid col |
| chr1  | 225760700 | 225851423 | ENAH                       | sigmoid col |
| chr4  | 57894181  | 57986667  | LOC255130, POLR2B, IGFBP7  | sigmoid col |
| chr10 | 104341586 | 104437047 | SUFU, ARL3, TRIM8          | sigmoid col |
| chr3  | 111570158 | 111691184 | PHLDB2                     | sigmoid col |
| chr10 | 79108145  | 79242237  | KCNMA1                     | sigmoid col |
| chr7  | 104581435 | 104687801 | MLL5, LOC100216545         | sigmoid col |
| chr17 | 57405947  | 57485161  | YPEL2                      | sigmoid col |
| chr7  | 150634953 | 150683198 | KCNH2                      | sigmoid col |

|       |           |           |                            |             |
|-------|-----------|-----------|----------------------------|-------------|
| chr19 | 13941672  | 13964655  | LOC284454,MIR24-2,ZSWIM4   | sigmoid col |
| chr7  | 55085526  | 55208921  | EGFR                       | sigmoid col |
| chr15 | 98503776  | 98569744  | ARRDC4                     | sigmoid col |
| chr14 | 91073532  | 91166211  | TTC7B                      | sigmoid col |
| chr2  | 227586129 | 227667358 | IRS1                       | sigmoid col |
| chr6  | 110641889 | 110686680 | C6orf186                   | sigmoid col |
| chr4  | 119655117 | 119715604 | SEC24D                     | sigmoid col |
| chr19 | 15353171  | 15443983  | BRD4                       | sigmoid col |
| chr15 | 67356504  | 67450304  | SMAD3                      | sigmoid col |
| chr15 | 40613011  | 40636781  | C15orf52                   | sigmoid col |
| chr3  | 30467238  | 30570282  |                            | sigmoid col |
| chr2  | 28806399  | 28941035  | PLB1                       | sigmoid col |
| chr2  | 47030981  | 47110289  | LOC100134259,LOC388948     | sigmoid col |
| chr5  | 139015481 | 139091585 | CXXC5                      | sigmoid col |
| chr11 | 123034074 | 123132374 | ASAM                       | sigmoid col |
| chr1  | 95319765  | 95403896  | LOC729970,SLC44A3,CNN3     | sigmoid col |
| chr19 | 5921146   | 5994938   | RFX2,RANBP3                | sigmoid col |
| chrX  | 153575502 | 153613100 | FLNA,EMD                   | sigmoid col |
| chr9  | 37993416  | 38071169  | SHB                        | sigmoid col |
| chr17 | 2286130   | 2325648   | METT10D,LOC284009,MNT      | sigmoid col |
| chr15 | 65009551  | 65070516  | RBPM5,MIR1272              | sigmoid col |
| chr4  | 88390459  | 88465132  | SPARCL1                    | sigmoid col |
| chr9  | 97805573  | 97859084  | MIR24-1,MIR23B,C9orf3,MIR2 | sigmoid col |
| chr10 | 75756886  | 75884412  | AP3M1,VCL                  | sigmoid col |
| chr2  | 86410137  | 86553030  | MRPL35,REEP1,IMMT          | sigmoid col |
| chr12 | 4377173   | 4419299   | CCND2                      | sigmoid col |
| chr20 | 10571910  | 10656582  | C20orf94,JAG1              | sigmoid col |
| chr15 | 89627766  | 89711757  | ABHD2                      | sigmoid col |
| chr5  | 176881044 | 176928486 | PRR7,DBN1,PDLIM7           | sigmoid col |
| chr1  | 164715593 | 164828140 | PBX1                       | sigmoid col |
| chr17 | 1325939   | 1401306   | MYO1C,CRK,INPP5K           | sigmoid col |
| chr3  | 112910936 | 113011256 | WDR52,BOC                  | sigmoid col |
| chr17 | 36574414  | 36644029  | ARHGAP23                   | sigmoid col |
| chr12 | 96581411  | 96658001  | ELK3                       | sigmoid col |
| chr6  | 76108625  | 76204922  | FILIP1                     | sigmoid col |
| chr19 | 39886574  | 39907815  | ZFP36,PLEKHG2,MED29        | sigmoid col |
| chr20 | 61320393  | 61393710  | NTSR1                      | sigmoid col |
| chr17 | 48250244  | 48293550  | COL1A1,SGCA                | sigmoid col |
| chr10 | 73722050  | 73777707  | CHST3                      | sigmoid col |
| chr19 | 12868209  | 12907877  | HOOK2,PRDX2,JUNB,BEST2     | sigmoid col |
| chr10 | 112499406 | 112599709 | RBM20                      | sigmoid col |
| chr5  | 172063786 | 172127676 | NEURL1B                    | sigmoid col |
| chr6  | 16697604  | 16772372  | ATXN1                      | sigmoid col |
| chr18 | 55842632  | 55956791  | NEDD4L                     | sigmoid col |
| chr22 | 38274049  | 38334283  | MICALL1,EIF3L              | sigmoid col |
| chr18 | 46446572  | 46502983  | SMAD7                      | sigmoid col |
| chr9  | 139404505 | 139471332 | NOTCH1                     | sigmoid col |
| chr10 | 35616549  | 35750728  | CCNY                       | sigmoid col |
| chr14 | 53328578  | 53428011  | FERMT2                     | sigmoid col |
| chr14 | 70076712  | 70194335  | KIAA0247                   | sigmoid col |
| chr8  | 124629210 | 124720848 | KLHL38,ANXA13              | sigmoid col |
| chr17 | 78988848  | 79072229  | BAIAP2,FLJ90757            | sigmoid col |

|       |           |           |                         |             |
|-------|-----------|-----------|-------------------------|-------------|
| chr17 | 57881455  | 57934720  | MIR21,TMEM49            | sigmoid col |
| chr17 | 76309768  | 76416976  | SOCS3,PGS1              | sigmoid col |
| chr11 | 12692301  | 12768861  | TEAD1                   | sigmoid col |
| chr6  | 111860433 | 111931087 | TRAF3IP2,LOC643749      | sigmoid col |
| chr13 | 21564071  | 21654663  | LATS2                   | sigmoid col |
| chr17 | 38440173  | 38514852  | RARA,CDC6               | sigmoid col |
| chr8  | 26433372  | 26517506  | DPYSL2                  | sigmoid col |
| chr11 | 2387145   | 2441934   | TSSC4,CD81,TRPM5        | sigmoid col |
| chr19 | 3632861   | 3700511   | PIP5K1C                 | sigmoid col |
| chr4  | 37861848  | 37933881  | PGM2,TBC1D1             | sigmoid col |
| chr2  | 109149701 | 109254763 | LIMS1                   | sigmoid col |
| chr5  | 58978003  | 59096098  | PDE4D                   | sigmoid col |
| chr10 | 521725    | 576032    | DIP2C                   | sigmoid col |
| chr2  | 207979968 | 208033795 | KLF7                    | sigmoid col |
| chr22 | 18371559  | 18488948  | MIR648,MICAL3           | sigmoid col |
| chr2  | 218220948 | 218305822 | DIRC3                   | sigmoid col |
| chr3  | 187968830 | 187999483 | LPP                     | sigmoid col |
| chr2  | 20577957  | 20667975  | RHOB                    | sigmoid col |
| chr7  | 105409942 | 105548294 | ATXN7L1                 | sigmoid col |
| chr1  | 31348445  | 31402303  | SDC3                    | sigmoid col |
| chr8  | 103588289 | 103675843 | KLF10                   | sigmoid col |
| chr10 | 134371726 | 134458649 | INPP5A                  | sigmoid col |
| chr4  | 151486788 | 151520708 | MAB21L2,LRBA            | sigmoid col |
| chr12 | 119612670 | 119658413 | HSPB8                   | sigmoid col |
| chr1  | 85986921  | 86078803  | CYR61,DDAH1             | sigmoid col |
| chr9  | 138947298 | 139002807 | NACC2                   | sigmoid col |
| chr6  | 7106520   | 7189987   | RREB1                   | sigmoid col |
| chr16 | 75075893  | 75146308  | LDHD,ZNRF1              | sigmoid col |
| chr5  | 171826882 | 171883748 | SH3PXD2B                | sigmoid col |
| chr10 | 101278938 | 101311740 | NKX2-3                  | sigmoid col |
| chr9  | 14237944  | 14327352  | NFIB                    | sigmoid col |
| chr20 | 56007710  | 56070969  |                         | sigmoid col |
| chr12 | 16721910  | 16767187  | LMO3                    | sigmoid col |
| chr2  | 218111207 | 218205163 | DIRC3                   | sigmoid col |
| chr11 | 64617001  | 64655859  | EHD1                    | sigmoid col |
| chr1  | 150118651 | 150138830 | PLEKHO1                 | sigmoid col |
| chr10 | 104153197 | 104171320 | NFKB2,PSD               | sigmoid col |
| chr10 | 29903485  | 29942368  | SVIL                    | sigmoid col |
| chr20 | 48702182  | 48790076  | TMEM189,UBE2V1,TMEM189  | sigmoid col |
| chr2  | 60726799  | 60787299  | BCL11A                  | sigmoid col |
| chr7  | 50719236  | 50798934  | GRB10                   | sigmoid col |
| chr3  | 30638222  | 30735636  | TGFBR2                  | sigmoid col |
| chr11 | 65042683  | 65098074  | CDC42EP2,POLA2          | sigmoid col |
| chr3  | 99551057  | 99602185  | FILIP1L,C3orf26,MIR548G | sigmoid col |
| chr8  | 38261736  | 38326827  | LETM2,FGFR1             | sigmoid col |
| chr17 | 74676773  | 74706864  | MXRA7                   | sigmoid col |
| chr1  | 19220787  | 19289575  | ALDH4A1,IFFO2           | sigmoid col |
| chr1  | 157961886 | 158019800 | KIRREL                  | sigmoid col |
| chr3  | 50264320  | 50311383  | GNAI2,SEMA3B            | sigmoid col |
| chr1  | 8063343   | 8158430   | ERRFI1                  | sigmoid col |
| chr1  | 2120414   | 2147468   | LOC100128003,C1orf86    | sigmoid col |
| chr12 | 27390901  | 27478271  | STK38L                  | sigmoid col |



|       |           |           |                            |             |
|-------|-----------|-----------|----------------------------|-------------|
| chr14 | 68972191  | 69031834  | RAD51L1                    | sigmoid col |
| chr10 | 79596279  | 79680812  | DLG5                       | sigmoid col |
| chr7  | 158570050 | 158623810 | ESYT2                      | sigmoid col |
| chr1  | 115580505 | 115643569 | TSPAN2                     | sigmoid col |
| chr7  | 120627294 | 120690303 | C7orf58                    | sigmoid col |
| chr12 | 109881244 | 109916175 | UBE3B,MYO1H,KCTD10         | sigmoid col |
| chr20 | 25202859  | 25292786  | PYGB,ENTPD6,ABHD12         | sigmoid col |
| chr14 | 90846545  | 90886471  | CALM1                      | sigmoid col |
| chr17 | 45301627  | 45395406  | ITGB3                      | sigmoid col |
| chr1  | 145433959 | 145458236 | TXNIP,POLR3GL              | sigmoid col |
| chr9  | 133022438 | 133071058 |                            | sigmoid col |
| chr8  | 120959030 | 121054329 | DEPDC6                     | sigmoid col |
| chr1  | 85614932  | 85711936  | SYDE2                      | sigmoid col |
| chr10 | 93329862  | 93395272  | PPP1R3C,LOC100188947       | sigmoid col |
| chr3  | 48029903  | 48131561  | MAP4                       | sigmoid col |
| chr2  | 28611250  | 28643133  | FOSL2                      | sigmoid col |
| chr10 | 75595628  | 75649631  | CAMK2G                     | sigmoid col |
| chr14 | 102236604 | 102321184 | PPP2R5C                    | sigmoid col |
| chr11 | 68685990  | 68736700  | IGHMBP2                    | sigmoid col |
| chr6  | 10545317  | 10628249  | GCNT2                      | sigmoid col |
| chr14 | 103981067 | 104013232 | CKB,TRMT61A                | sigmoid col |
| chr7  | 2756323   | 2837050   | GNA12                      | sigmoid col |
| chr1  | 150530941 | 150553244 | ADAMTSL4,MCL1              | sigmoid col |
| chr4  | 187586792 | 187648675 | FAT1                       | sigmoid col |
| chr1  | 221870972 | 221917321 | DUSP10                     | sigmoid col |
| chr19 | 48184596  | 48249834  | GLTSCR1,GLTSCR2,EHD2       | sigmoid col |
| chr7  | 30877038  | 30972025  | AQP1,INMT-FAM188B,FAM188A  | sigmoid col |
| chr11 | 8775643   | 8813607   | ST5                        | sigmoid col |
| chr20 | 31034326  | 31073948  | C20orf112                  | sigmoid col |
| chr10 | 121238169 | 121335196 | RGS10,TIAL1                | sigmoid col |
| chr5  | 148757547 | 148773534 | IL17B                      | sigmoid col |
| chr14 | 69504815  | 69574740  | DCAF5                      | sigmoid col |
| chr15 | 90576757  | 90656152  | ZNF710,IDH2                | sigmoid col |
| chr18 | 9093618   | 9148138   | NDUFV2,ANKRD12             | sigmoid col |
| chr2  | 216516186 | 216589576 | LOC646324                  | sigmoid col |
| chr9  | 134247926 | 134312421 | BAT2L1                     | sigmoid col |
| chr17 | 48968703  | 49045988  | SPAG9                      | sigmoid col |
| chr1  | 182990044 | 183071462 | LAMC1                      | sigmoid col |
| chr11 | 74380735  | 74443171  | CHRD12                     | sigmoid col |
| chr3  | 45980573  | 46049078  | CXCR6,FYCO1                | sigmoid col |
| chr7  | 93976981  | 94055470  | COL1A2                     | sigmoid col |
| chr17 | 63002040  | 63076267  | GNA13                      | sigmoid col |
| chr10 | 34990359  | 35105809  | PARD3                      | sigmoid col |
| chr11 | 6613324   | 6637853   | TPP1,ILK,RRP8,TAF10        | sigmoid col |
| chr16 | 22199619  | 22253252  | EEF2K                      | sigmoid col |
| chr1  | 68633839  | 68699207  | WLS,MIR1262                | sigmoid col |
| chr7  | 73865751  | 73929299  | GTF2IRD1                   | sigmoid col |
| chr20 | 37554346  | 37617249  | FAM83D,DHX35               | sigmoid col |
| chr12 | 26844187  | 26984555  | ITPR2                      | sigmoid col |
| chr18 | 72908650  | 72940424  | ZADH2,TSHZ1                | sigmoid col |
| chr18 | 74147317  | 74210194  | ZNF516                     | sigmoid col |
| chr2  | 48735300  | 48800658  | STON1,STON1-GTF2A1L,KLRAC1 | sigmoid col |

|       |           |           |                               |             |
|-------|-----------|-----------|-------------------------------|-------------|
| chr3  | 71244658  | 71321149  | FOXP1                         | sigmoid col |
| chr10 | 134260591 | 134358926 | INPP5A,C10orf91               | sigmoid col |
| chr4  | 80917914  | 80996173  | ANTXR2                        | sigmoid col |
| chr10 | 121409580 | 121446709 | BAG3                          | sigmoid col |
| chr9  | 130805425 | 130872010 | SLC25A25,NAIF1                | sigmoid col |
| chr10 | 61594492  | 61669700  | CCDC6                         | sigmoid col |
| chr2  | 232461634 | 232509602 |                               | sigmoid col |
| chr2  | 9305413   | 9404895   | ASAP2                         | sigmoid col |
| chr22 | 44699369  | 44760760  | KIAA1644                      | sigmoid col |
| chr10 | 21798563  | 21825442  | MLLT10,C10orf140              | sigmoid col |
| chr3  | 177156282 | 177209533 |                               | sigmoid col |
| chr19 | 46266780  | 46289665  | SIX5,DMPK,DMWD                | sigmoid col |
| chr11 | 119168414 | 119212304 | CBL,MCAM,RNF26,C1QTNF5        | sigmoid col |
| chr2  | 37867865  | 37918020  | CDC42EP3                      | sigmoid col |
| chr17 | 38213871  | 38237889  | THRA                          | sigmoid col |
| chr19 | 17186542  | 17256567  | MYO9B                         | sigmoid col |
| chr8  | 59956982  | 60033412  | TOX                           | sigmoid col |
| chr3  | 69786901  | 69842232  | MITF                          | sigmoid col |
| chr15 | 65127482  | 65197933  | PLEKHO2                       | sigmoid col |
| chr9  | 125108325 | 125169166 | PTGS1                         | sigmoid col |
| chr1  | 8175372   | 8235316   |                               | sigmoid col |
| chr11 | 75012502  | 75064289  | ARRB1,MIR326                  | sigmoid col |
| chr3  | 151974071 | 152003996 | LOC401093,MBNL1               | sigmoid col |
| chr12 | 6431171   | 6453746   | PLEKHG6,TNFRSF1A              | sigmoid col |
| chr11 | 75258793  | 75296382  | SERPINH1                      | sigmoid col |
| chr9  | 12774502  | 12827397  | C9orf150                      | sigmoid col |
| chr17 | 17711956  | 17754247  | MIR33B,SREBF1,TOM1L2,RAI1     | sigmoid col |
| chr12 | 53431738  | 53469153  | SPRYD3,LOC283335,TENC1,ELAVL1 | sigmoid col |
| chr7  | 128457839 | 128503963 | CCDC136,FLNC,ATP6V1F          | sigmoid col |
| chr20 | 55963562  | 55991450  | RBM38                         | sigmoid col |
| chr1  | 25030875  | 25133651  | CLIC4                         | sigmoid col |
| chr4  | 15002301  | 15045845  | CPEB2                         | sigmoid col |
| chr17 | 55149355  | 55192078  | AKAP1                         | sigmoid col |
| chr7  | 27134872  | 27161084  | HOXA1,HOXA2,HOXA3             | sigmoid col |
| chr1  | 15472102  | 15542662  | TMEM51,C1orf126               | sigmoid col |
| chr12 | 47458892  | 47499194  | AMIGO2                        | sigmoid col |
| chr15 | 39718874  | 39797713  |                               | sigmoid col |
| chr17 | 55935568  | 55960848  | CUEDC1                        | sigmoid col |
| chr11 | 122927309 | 123016970 | HSPA8,ASAM                    | sigmoid col |
| chrX  | 2582021   | 2642515   | CD99                          | sigmoid col |
| chr4  | 175025154 | 175079913 |                               | sigmoid col |
| chr18 | 9797450   | 9885275   | RAB31                         | sigmoid col |
| chr12 | 26110101  | 26186440  | RASSF8                        | sigmoid col |
| chr10 | 3784049   | 3830388   | KLF6                          | sigmoid col |
| chr4  | 38663000  | 38699977  | FLJ13197,KLF3                 | sigmoid col |
| chr12 | 125388500 | 125426128 | UBC                           | sigmoid col |
| chr11 | 117720480 | 117760101 | FXVD6                         | sigmoid col |
| chr9  | 36135788  | 36167072  | GLIPR2                        | sigmoid col |
| chr12 | 68688635  | 68759780  | MDM1                          | sigmoid col |
| chr7  | 27161291  | 27193446  | HOXA7,HOXA5,HOXA6,HOXA4       | sigmoid col |
| chr22 | 34181247  | 34283438  | LARGE                         | sigmoid col |
| chr6  | 53152084  | 53226111  | ELOVL5                        | sigmoid col |

|       |           |           |                          |             |
|-------|-----------|-----------|--------------------------|-------------|
| chr12 | 2160447   | 2187916   | CACNA1C                  | sigmoid col |
| chr2  | 46038237  | 46118074  | PRKCE                    | sigmoid col |
| chr12 | 7032801   | 7056201   | ENO2,PTPN6,ATN1,C12orf57 | sigmoid col |
| chr15 | 70339787  | 70415515  | MIR629,TLE3              | sigmoid col |
| chr12 | 120661372 | 120703574 | PXN                      | sigmoid col |
| chr3  | 145834922 | 145896384 | PLOD2                    | sigmoid col |
| chr1  | 206845718 | 206924160 | MAPKAPK2                 | sigmoid col |
| chr1  | 221046494 | 221070203 | HLX                      | sigmoid col |
| chr1  | 32029924  | 32059131  | TINAGL1                  | sigmoid col |
| chr19 | 4038773   | 4078893   | ZBTB7A                   | sigmoid col |
| chr5  | 66528676  | 66612324  |                          | sigmoid col |
| chr19 | 13259829  | 13293234  | STX10,IER2               | sigmoid col |
| chr4  | 156579826 | 156628010 | GUCY1A3                  | sigmoid col |
| chr20 | 44033191  | 44095558  | PIGT,DBNDD2,SYS1-DBNDD2  | sigmoid col |
| chr16 | 85179947  | 85272599  | LOC400548                | sigmoid col |
| chr2  | 42272369  | 42295722  | PKDCC                    | sigmoid col |
| chr13 | 111038226 | 111061147 | COL4A2                   | sigmoid col |
| chr11 | 65331945  | 65362100  | FAM89B,EHBP1L1,KCNK7,SSS | sigmoid col |
| chr14 | 90976225  | 91047813  | TTC7B                    | sigmoid col |
| chr1  | 226964985 | 227016279 |                          | sigmoid col |
| chr20 | 21130366  | 21183811  | PLK1S1                   | sigmoid col |
| chr3  | 48440804  | 48478254  | PLXNB1,CCDC51            | sigmoid col |
| chrX  | 39920805  | 39969960  | BCOR                     | sigmoid col |
| chr9  | 116216141 | 116322303 | RGS3                     | sigmoid col |
| chr20 | 35143959  | 35182009  | DLGAP4,MYL9              | sigmoid col |
| chr3  | 134068340 | 134094769 | AMOTL2                   | sigmoid col |
| chr22 | 30667159  | 30745349  | TBC1D10A,SF3A1,GATSL3    | sigmoid col |
| chr5  | 171950336 | 171997826 |                          | sigmoid col |
| chr7  | 80451505  | 80537804  | SEMA3C                   | sigmoid col |
| chr3  | 156760622 | 156830552 | LOC100498859,LEKR1,LOC33 | sigmoid col |
| chr1  | 226733295 | 226796544 | C1orf95                  | sigmoid col |
| chr1  | 17853251  | 17918151  | ARHGEF10L                | sigmoid col |
| chr22 | 20861218  | 20924763  | MED15                    | sigmoid col |
| chr1  | 32131404  | 32182175  | COL16A1                  | sigmoid col |
| chr18 | 46064549  | 46124613  | KIAA0427                 | sigmoid col |
| chr14 | 75724058  | 75782444  | FOS                      | sigmoid col |
| chr16 | 20861350  | 20925989  | LYRM1,DCUN1D3            | sigmoid col |
| chr22 | 23505338  | 23632799  | FBXW4P1,RAB36,BCR        | sigmoid col |
| chr16 | 24696754  | 24806847  | TNRC6A                   | sigmoid col |
| chr3  | 73434490  | 73507608  | PDZRN3                   | sigmoid col |
| chr16 | 56267154  | 56312569  | GNAO1,MIR3935            | sigmoid col |
| chr4  | 126234874 | 126324122 | FAT4                     | sigmoid col |
| chr10 | 31015855  | 31075970  |                          | sigmoid col |
| chr12 | 65058493  | 65091342  | RASSF3                   | sigmoid col |
| chr12 | 2068546   | 2092578   | DCP1B                    | sigmoid col |
| chr12 | 6640594   | 6667777   | GAPDH,NOP2,NCAPD2,IFFO1  | sigmoid col |
| chr1  | 27319790  | 27360493  | TRNP1,FAM46B             | sigmoid col |
| chr7  | 836592    | 885101    | SUN1                     | sigmoid col |
| chr11 | 71697296  | 71757996  | IL18BP,NUMA1,RNF121      | sigmoid col |
| chr16 | 85382882  | 85431149  |                          | sigmoid col |
| chr9  | 132864347 | 132907456 | GPR107                   | sigmoid col |
| chr17 | 53342254  | 53380890  | HLF                      | sigmoid col |

|       |           |           |                          |                    |
|-------|-----------|-----------|--------------------------|--------------------|
| chr6  | 44170549  | 44206742  | SLC29A1                  | sigmoid col        |
| chr11 | 74316542  | 74363135  | POLD3                    | sigmoid col        |
| chr16 | 87395900  | 87428140  | FBXO31,MAP1LC3B          | sigmoid col        |
| chr13 | 44865672  | 44907844  |                          | sigmoid col        |
| chr10 | 101665791 | 101770972 | NCRNA00093,DNMBP         | sigmoid col        |
| chr12 | 80264451  | 80341648  | PPP1R12A                 | sigmoid col        |
| chr10 | 30113983  | 30136339  |                          | sigmoid col        |
| chr15 | 49713814  | 49764730  | FGF7,C15orf33            | sigmoid col        |
| chr13 | 51796464  | 51867027  | FAM124A                  | sigmoid col        |
| chr13 | 110872253 | 110904774 | COL4A1                   | sigmoid col        |
| chr7  | 5592387   | 5678098   | RNF216,FSCN1             | sigmoid col        |
| chr3  | 151909717 | 151943487 |                          | sigmoid col        |
| chr17 | 75299951  | 75330415  |                          | 09-Sep sigmoid col |
| chr8  | 42316065  | 42371823  | SLC20A2                  | sigmoid col        |
| chr1  | 208314564 | 208414558 | PLXNA2                   | sigmoid col        |
| chr5  | 37805863  | 37842233  | GDNF                     | sigmoid col        |
| chr2  | 23624540  | 23705454  | KLHL29                   | sigmoid col        |
| chr15 | 74273687  | 74346268  | PML,STOML1               | sigmoid col        |
| chr12 | 96732602  | 96796107  | CDK17                    | sigmoid col        |
| chr12 | 46745599  | 46798912  | SLC38A2                  | sigmoid col        |
| chr17 | 29864987  | 29924399  | RAB11FIP4,MIR193A,MIR365 | sigmoid col        |
| chr3  | 120131889 | 120172057 | FSTL1                    | sigmoid col        |
| chr7  | 143064818 | 143091346 | ZYX,EPHA1                | sigmoid col        |
| chr3  | 64627257  | 64676008  | ADAMTS9                  | sigmoid col        |
| chr6  | 35685620  | 35702787  | FKBP5,LOC285847          | sigmoid col        |
| chr12 | 94195320  | 94223507  | CRADD                    | sigmoid col        |
| chr5  | 131589843 | 131611217 | PDLIM4                   | sigmoid col        |
| chr9  | 75511580  | 75571215  | ALDH1A1                  | sigmoid col        |
| chr8  | 93063087  | 93121119  | RUNX1T1                  | sigmoid col        |
| chr22 | 28238691  | 28289216  | PITPNB                   | sigmoid col        |
| chr9  | 35678406  | 35702909  | TPM2,CA9,TLN1            | sigmoid col        |
| chr21 | 46494555  | 46589505  | ADARB1                   | sigmoid col        |
| chr8  | 28189593  | 28270744  | PNOC,ZNF395              | sigmoid col        |
