# Supplementary material for: Recurrent Superenhancer of the Oncogene POU5F1B in Colorectal Cancers
Source: Hindawi journal article supplement (doi:10.1155/2021/5405060), 2021-01-01
Supplement: f2 [file 5405060.f2.pdf]

|           | Forward Primer                                   | Reverse Primer                       |
|-----------|--------------------------------------------------|--------------------------------------|
| Chip-qPCR | 5'-<br>GTGTATCTTAGTTCAACCAAATTGT<br>AATCATCTG-3' | 5'-CAGTGCAGGGTCCGAGGT-<br>3'         |
| POU5F1B   | 5'-CCTGAAGCAGAAGAGGATCACC-<br>3'                 | 5'-<br>AAGCGGCAGATGGTCTTTTG<br>GC-3' |
| GAPDH     | 5'-GAAGGTGAAGGTCGGAGTC-3'                        | 5'-<br>GAAGATGGTGATGGGATTTC-<br>3'   |
